# Supplementary material
Source: Copernicus journal article supplement (doi:10.5194/tc-20-3739-2026)
Supplement: Supplementary file 1 [file Figure S1.pdf › Figure S1.pdf]

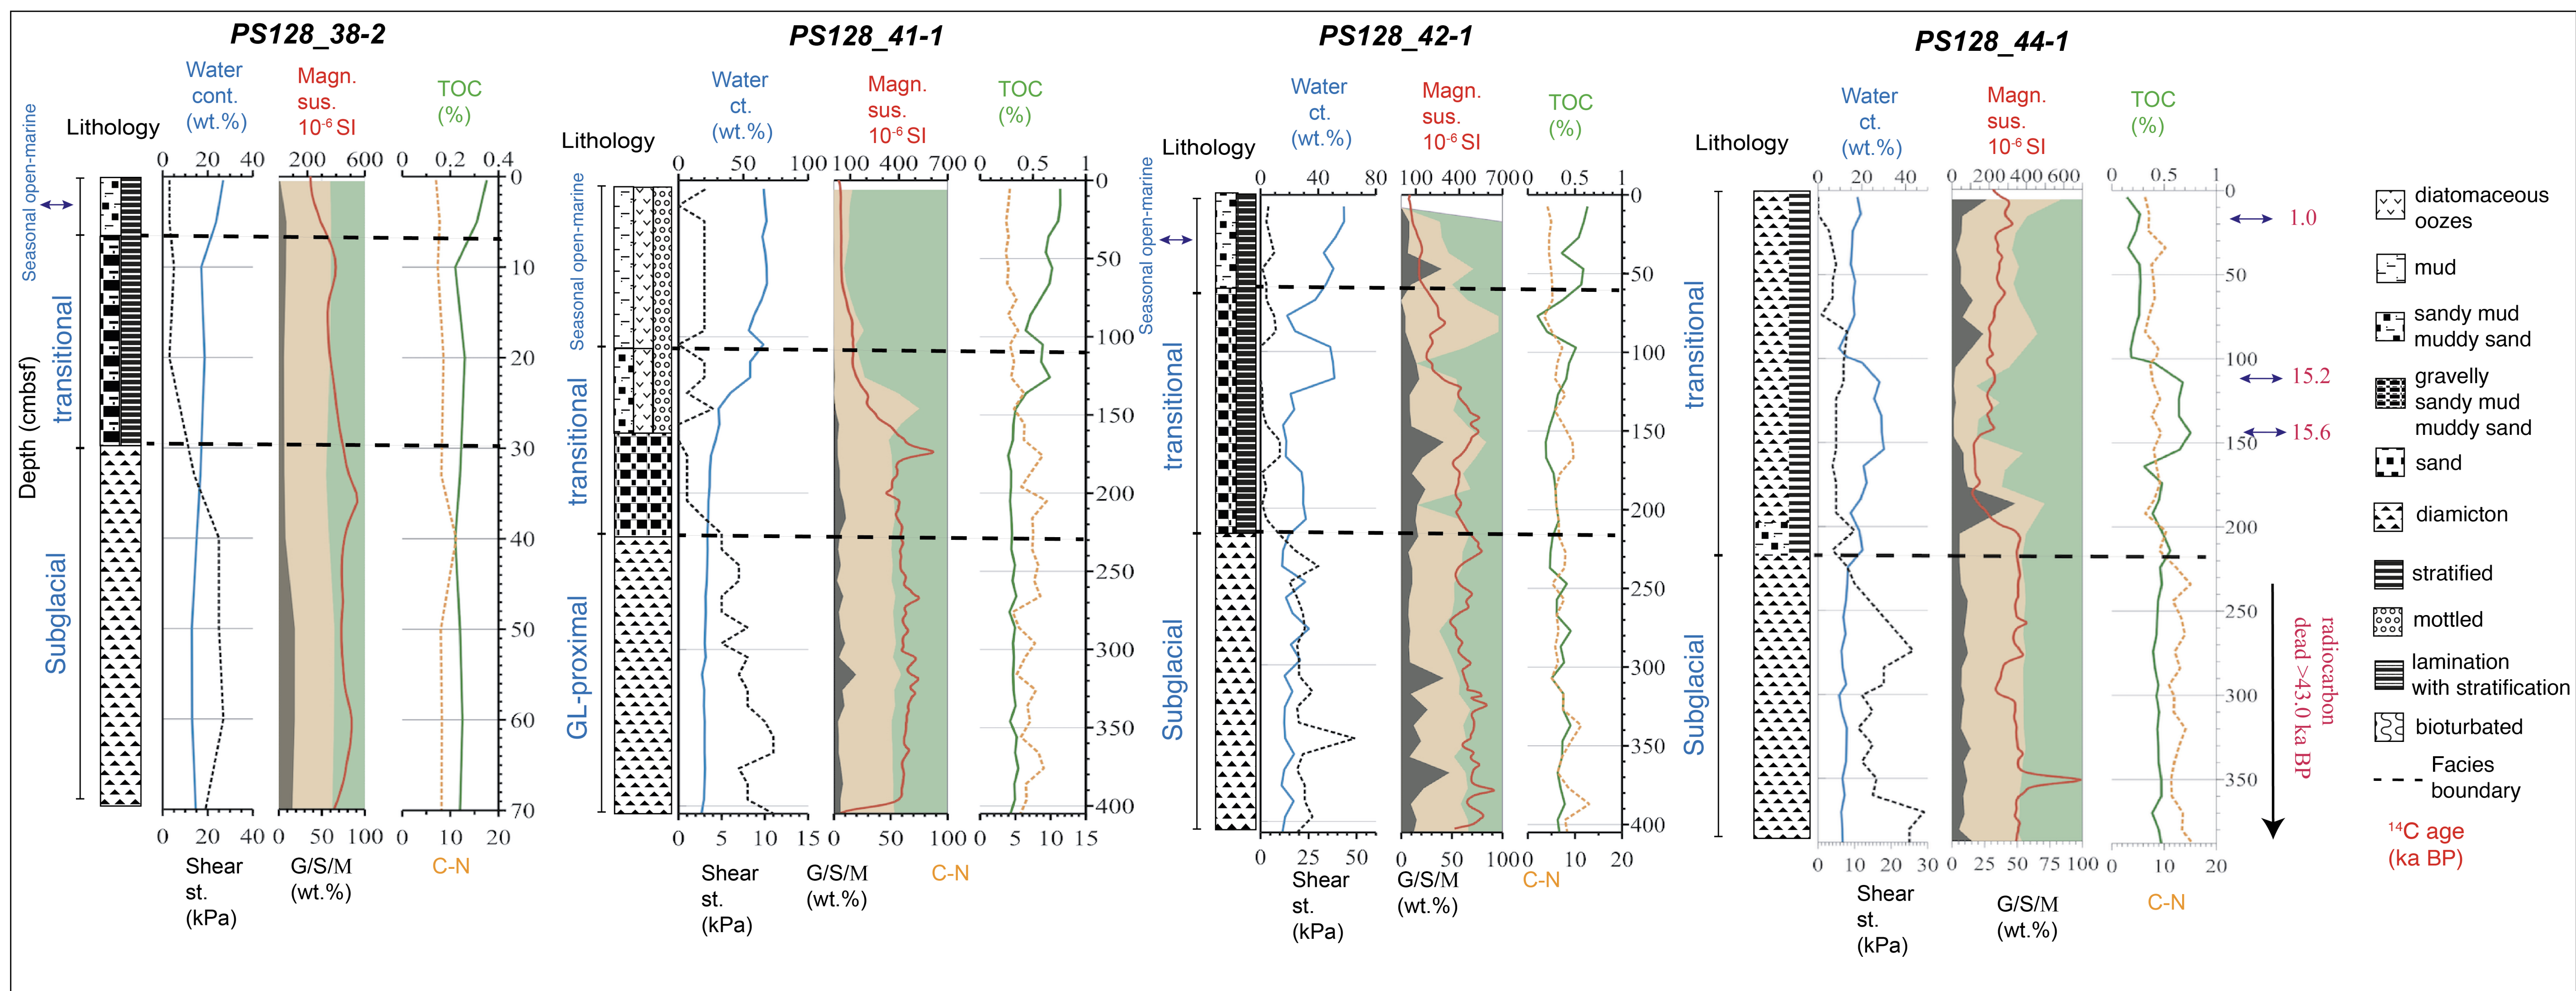

Figure S1: Core parameters for Nielsen Basin cores PS128-44-1, PS128\_42-1, PS128\_41-1, and PS128\_38-2 (Lithology, Water content wt. %, Shear strength kPa (dotted line), Grain size distribution wt. % G (Gravel), S (Sand), M (Mud), magnetic susceptibility  $\text{SI}^{-6}$ , TOC %, C:N (dotted line). Red numbers are calibrated foraminifera-derived radiocarbon ages (Stuiver and Reimer, 1998; Heaton et al., 2023). The dashed lines mark the facies boundaries.
