# Supplementary material
Source: Copernicus journal article supplement (doi:10.5194/tc-20-3739-2026)
Supplement: Supplementary file 2 [file Table S1.pdf › Table S1.pdf]

**Table S1 Full list of all measured conventional and calibrated radiocarbon ages and full description of Ramped Pyrolysis Oxidation (RPO).**

| Core Nr./<br>position                | Depth<br>(cmbsf) | Carbonate<br>source     | Conventional<br>radiocarbon ages<br><br>( <sup>14</sup> C ka BP) +-<br>error | Marine20<br>calibration<br><br>Age range (cal ka<br>BP) 2 sigma<br>rounded | Median<br><br>(cal ka BP) rounded |
|--------------------------------------|------------------|-------------------------|------------------------------------------------------------------------------|----------------------------------------------------------------------------|-----------------------------------|
| <b>PS128_44-1/Outer<br/>shelf NB</b> | 6                | Benthic<br>foraminifers | 1,583 +-71                                                                   | 772 - 1,172                                                                | 1,000                             |
|                                      | 106              | Benthic<br>foraminifers | 14,095 +-142                                                                 | 14,806 - 15,665                                                            | 15,200                            |
|                                      | 147              | Benthic<br>foraminifers | 14,356 +-149                                                                 | 15,133 - 16,010                                                            | 15,600                            |
| <b>PS128_46-1/Outer<br/>shelf IA</b> | 192              | Benthic<br>foraminifers | 11,625 +-135                                                                 | 11,730 - 12,563                                                            | 12,200                            |
|                                      | 220              | Benthic<br>foraminifers | 11,629+-116                                                                  | 11,761 - 12,514                                                            | 12,200                            |
|                                      | 228              | Benthic<br>foraminifers | 11,606 +-106                                                                 | 11,764 - 12,475                                                            | 12,100                            |
|                                      | <b>243</b>       | Benthic<br>foraminifers | 12,487 +-111                                                                 | 12,783 - 13,307                                                            | 13,000                            |

Ramped-Pyrolysis-Oxidation (RPO) <sup>14</sup>C ages were determined using a modified SoliTOC Cube Carbon Analyzer (Elementar Analysensysteme GmbH, Germany) located at the radiocarbon dating facility of the Alfred Wegener Institute (AWI) in Bremerhaven. 100 mg of ground, freeze-dried sediment was weighted into pre-combusted (6h at 900°C) ceramic crucibles, acidified with 3 drops of 0.5 M HCl and placed on a heating plate at 60°C for 1h to remove inorganic carbon. This procedure was repeated two more times and the sediment was allowed to dry completely before analysis. RPO was conducted in pyrolysis mode (oxygen-free conditions) with a heating rate of 15°C/min. Based on the shape of the thermograms (evolved CO<sub>2</sub> over temperature) the temperature limit for an appropriate fraction was determined such that the upper temperature limit was as low as possible while including a total amount of 80-100 µgC. For the trapping run, an appropriate amount of sediment was weighted in, prepared and analysed as described above. During this second run, all CO<sub>2</sub> produced between the onset of the heating phase and 290°C was collected on a self-constructed zeolite trap system and subsequently <sup>14</sup>C-analysed using AWI's Mini C ARbon DAting System (MICADAS 15; Ionplus AG, Switzerland) applying the standard gas measurement method. The data were blank corrected against blank and modern CO<sub>2</sub> reference gases (Rosenheim et al.2008; Mollenhauer et al., 2021).

Mollenhauer, G., Grotheer, H., Gentz, T., Bonk, E., and Hefter, J.: Standard operation procedures and performance of the MICADAS radiocarbon laboratory at Alfred Wegener Institute (AWI), Germany, Nuclear Instruments and Methods in Physics Research Section B: Beam Interactions with Materials and Atoms, 496, 45–51, <https://doi.org/10.1016/j.nimb.2021.03.016>, 2021.

Rosenheim, B. E., Day, M. B., Domack, E., Schrum, H., Benthien, A., and Hayes, J. M.: Antarctic sediment chronology by programmed-temperature pyrolysis: Methodology and data treatment, Geochem Geophys Geosyst, 9, 2007GC001816, <https://doi.org/10.1029/2007GC001816>, 2008.
