# Supplementary material
Source: Copernicus journal article supplement (doi:10.5194/tc-20-3739-2026)
Supplement: Supplementary file [file tc-20-3739-2026-supplement-title-page.pdf › tc-20-3739-2026-supplement-title-page.pdf]

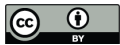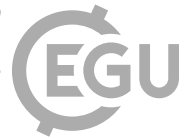

*Supplement of*

## **Last Glacial Maximum extent and subsequent retreat of the East Antarctic Ice Sheet from the Mac. Robertson Shelf**

**Janina Güntzel et al.**

*Correspondence to:* Janina Güntzel ([janina.guentzel@awi.de](mailto:janina.guentzel@awi.de))

- [tc-20-3739-2026-supplement-title-page.pdf](#)
- [Figure S1.pdf](#)
- [Table S1.pdf](#)

The copyright of individual parts of the supplement might differ from the article licence.
